# Supplementary material
Source: bioRxiv or medRxiv preprint supplement (https://www.medrxiv.org/highwire/filestream/86735/field_highwire_adjunct_files/0/2020.06.18.20133660-1.pdf)
Supplement: Supplementary file [file 2020.06.18.20133660-1.pdf]

**Table S1. Prevalence estimated by the test relative to true prevalence and different levels of specificity and sensitivity #**

| Specificity | Sensitivity | true prevalence |      |     |      |      |      |      | relative error \$ |
|-------------|-------------|-----------------|------|-----|------|------|------|------|-------------------|
|             |             | 1               | 3    | 5   | 10   | 20   | 50   | 90   |                   |
| 100         | 100         | 1,00            | 3,00 | 5,0 | 10,0 | 20,0 | 50,0 | 90,0 | +/- 5%            |
|             | 98          | 0,98            | 2,94 | 4,9 | 9,8  | 19,6 | 49,0 | 88,2 | +/- 10%           |
|             | 95          | 0,95            | 2,85 | 4,8 | 9,5  | 19,0 | 47,5 | 85,5 | +/- 20%           |
|             | 90          | 0,90            | 2,70 | 4,5 | 9,0  | 18,0 | 45,0 | 81,0 |                   |
|             | 85          | 0,85            | 2,55 | 4,3 | 8,5  | 17,0 | 42,5 | 76,5 |                   |
|             | 80          | 0,80            | 2,40 | 4,0 | 8,0  | 16,0 | 40,0 | 72,0 |                   |
| 99          | 100         | 1,99            | 3,97 | 6,0 | 10,9 | 20,8 | 50,5 | 90,1 |                   |
|             | 98          | 1,97            | 3,91 | 5,9 | 10,7 | 20,4 | 49,5 | 88,3 |                   |
|             | 95          | 1,94            | 3,82 | 5,7 | 10,4 | 19,8 | 48,0 | 85,6 |                   |
|             | 90          | 1,89            | 3,67 | 5,5 | 9,9  | 18,8 | 45,5 | 81,1 |                   |
|             | 85          | 1,84            | 3,52 | 5,2 | 9,4  | 17,8 | 43,0 | 76,6 |                   |
|             | 80          | 1,79            | 3,37 | 5,0 | 8,9  | 16,8 | 40,5 | 72,1 |                   |
| 98          | 100         | 2,98            | 4,94 | 6,9 | 11,8 | 21,6 | 51,0 | 90,2 |                   |
|             | 98          | 2,96            | 4,88 | 6,8 | 11,6 | 21,2 | 50,0 | 88,4 |                   |
|             | 95          | 2,93            | 4,79 | 6,7 | 11,3 | 20,6 | 48,5 | 85,7 |                   |
|             | 90          | 2,88            | 4,64 | 6,4 | 10,8 | 19,6 | 46,0 | 81,2 |                   |
|             | 85          | 2,83            | 4,49 | 6,2 | 10,3 | 18,6 | 43,5 | 76,7 |                   |
|             | 80          | 2,78            | 4,34 | 5,9 | 9,8  | 17,6 | 41,0 | 72,2 |                   |
| 97          | 100         | 3,97            | 5,91 | 7,9 | 12,7 | 22,4 | 51,5 | 90,3 |                   |
|             | 98          | 3,95            | 5,85 | 7,8 | 12,5 | 22,0 | 50,5 | 88,5 |                   |
|             | 95          | 3,92            | 5,76 | 7,6 | 12,2 | 21,4 | 49,0 | 85,8 |                   |
|             | 90          | 3,87            | 5,61 | 7,4 | 11,7 | 20,4 | 46,5 | 81,3 |                   |
|             | 85          | 3,82            | 5,46 | 7,1 | 11,2 | 19,4 | 44,0 | 76,8 |                   |
|             | 80          | 3,77            | 5,31 | 6,9 | 10,7 | 18,4 | 41,5 | 72,3 |                   |
| 96          | 100         | 4,96            | 6,88 | 8,8 | 13,6 | 23,2 | 52,0 | 90,4 |                   |
|             | 98          | 4,94            | 6,82 | 8,7 | 13,4 | 22,8 | 51,0 | 88,6 |                   |
|             | 95          | 4,91            | 6,73 | 8,6 | 13,1 | 22,2 | 49,5 | 85,9 |                   |
|             | 90          | 4,86            | 6,58 | 8,3 | 12,6 | 21,2 | 47,0 | 81,4 |                   |
|             | 85          | 4,81            | 6,43 | 8,1 | 12,1 | 20,2 | 44,5 | 76,9 |                   |
|             | 80          | 4,76            | 6,28 | 7,8 | 11,6 | 19,2 | 42,0 | 72,4 |                   |
| 95          | 100         | 5,95            | 7,85 | 9,8 | 14,5 | 24,0 | 52,5 | 90,5 |                   |
|             | 98          | 5,93            | 7,79 | 9,7 | 14,3 | 23,6 | 51,5 | 88,7 |                   |
|             | 95          | 5,90            | 7,70 | 9,5 | 14,0 | 23,0 | 50,0 | 86,0 |                   |
|             | 90          | 5,85            | 7,55 | 9,3 | 13,5 | 22,0 | 47,5 | 81,5 |                   |
|             | 85          | 5,80            | 7,40 | 9,0 | 13,0 | 21,0 | 45,0 | 77,0 |                   |
|             | 80          | 5,75            | 7,25 | 8,8 | 12,5 | 20,0 | 42,5 | 72,5 |                   |

# Prevalence estimation was calculated by subtracting the error caused by the putative assay sensitivity [1] and adding the percentage of putative assay specificity [2].

[1] sensitivity/100 \*true prevalence

[2] (100-true prevalence) \* (100-specificity)/100

\$. The relative error indicates the overall accuracy of the reported percentage of seroprevalence, it does not show what proportion is classified incorrectly positive or negative

**Table S2. Etiology of ILI and COVID-19 samples**

| <b>Etiology</b> |                  | <b>N</b> |
|-----------------|------------------|----------|
| COVID-19        | non-hospitalized | 65       |
|                 | hospitalized     | 40       |
| ILI hCoV        | HCoV-229E        | 29       |
|                 | HCoV-NL63        | 28       |
|                 | HCoV-OC43        | 45       |
|                 | HCoV-HKU-1       | 3        |
|                 | MERS-CoV         | 5        |
| ILI non-hCoV    | Influenza A/B    | 18       |
|                 | Rhino virus      | 9        |
|                 | RSV / hMPV       | 18       |
|                 | Para-influenza   | 8        |
|                 | other            | 21       |
